# Supplementary material for: Protein and Metabolite Analysis Reveals Permanent Induction of Stress Defense and Cell Regeneration Processes in a Tobacco Cell Suspension Culture
Source: MDPI journal article supplement (doi:10.3390/ijms10073012), 2009-07-06
Supplement: s1 [file s1]

**Figure S1.** A shift from the  $^{14}\text{N}$  to  $^{15}\text{N}$  isotope fragment of putrescine.

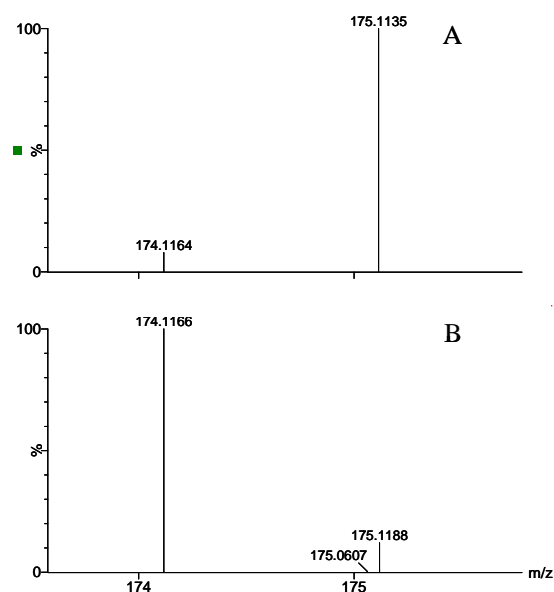

A) The isotope shift after 14d of cultivation with  $^{15}\text{N}$  labelled culture medium. B) Natural isotope pattern of the putrescine fragment.

**Figure S2.** Representative HPLC chromatogram of polyamine analysis from 7d old culture media.

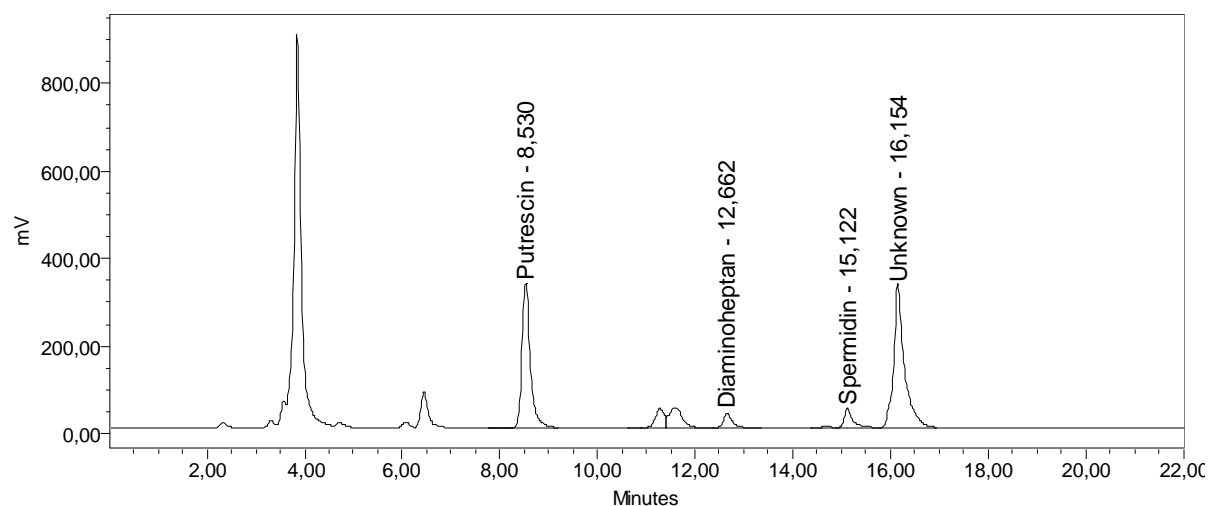

Polyamines were measured by fluorescence detection at 340 nm (excitation) and 510 nm (emission). The identification of polyamines was performed with authentic standards.

**Table S1.** Putative identity of compounds detected in the medium of S2LS3 culture. Metabolites were identified by matching their spectra to NIST library and the Golm metabolomics database. Retention time (RT), retention index (RI) calculated with alkanes; the match values from Nist, and the intensities (peak area) of a compound-specific molecular fragment (specific ion,  $m/z$ ) at different time points are shown. Values for peak area are given Not identified values were signed with n.i. and intensities under the detection limit signed with n.d.

| Identity                     | Specific ion<br>( $m/z$ ) | RT<br>[min] | RI   | RI<br>Golm<br>DB | Nist<br>Matc<br>h | Rev. Nist<br>Match | Peak<br>area 1d $\pm$<br>STD | Peak<br>area 3d $\pm$<br>STD | Peak<br>area 5d $\pm$<br>STD | Peak<br>area 7d $\pm$<br>STD |
|------------------------------|---------------------------|-------------|------|------------------|-------------------|--------------------|------------------------------|------------------------------|------------------------------|------------------------------|
| Lactic acid 2TMS             | 190,99                    | 6,58        | 1010 | 1051             | 883               | 884                | 492 $\pm$ 124                | 606 $\pm$ 218                | 726 $\pm$ 188                | 667 $\pm$ 66                 |
| Benzoic acid TMS             | 105,03                    | 11,03       | 1244 | 1253             | 789               | 851                | n.d                          | 12 $\pm$ 2                   | 11 $\pm$ 2                   | 10 $\pm$ 1                   |
| Galactose methoxyamine 5TMS  | 117,07                    | 22,34       | 1714 | 1721             | 723               | 744                | 7 $\pm$ 3                    | 48 $\pm$ 11                  | 124 $\pm$ 22                 | 131 $\pm$ 14                 |
| Putrescine 4TMS              | 174,11                    | 22,68       | 1729 | 1745             | 894               | 895                | 20 $\pm$ 9                   | 9 $\pm$ 2                    | 369 $\pm$ 80                 | 492 $\pm$ 115                |
| Unknown sugar 1              | 217,07                    | 23,31       | 1758 | n.i.             | n.i.              | n.i.               | 246 $\pm$ 77                 | 272 $\pm$ 73                 | 191 $\pm$ 38                 | 93 $\pm$ 10                  |
| Fructose methoxyamine 5TMS   | 364,00                    | 25,62       | 1870 | 1865             | 873               | 874                | 1200 $\pm$ 175               | 1440 $\pm$ 249               | 1306 $\pm$ 210               | 410 $\pm$ 84                 |
| Fructose methoxyamine 5TMS 2 | 364,18                    | 25,82       | 1880 | 1774             | 878               | 880                | 959 $\pm$ 104                | 1142 $\pm$ 200               | 286 $\pm$ 30                 | 360 $\pm$ 70                 |
| Glucose methoxyamine 5TMS    | 364,18                    | 26,07       | 1893 | 1888             | 908               | 923                | 455 $\pm$ 65                 | 286 $\pm$ 30                 | 151 $\pm$ 9                  | 19 $\pm$ 3                   |
| Glucose methoxyamine 5TMS 2  | 364,18                    | 26,39       | 1908 | 1910             | 828               | 918                | 11 $\pm$ 1                   | 10 $\pm$ 2                   | 2 $\pm$ 0.5                  | n.d.                         |
| Unknown sugar 2              | 205,10                    | 26,57       | 1917 | n.i.             | n.i.              | n.i.               | 137 $\pm$ 46                 | 120 $\pm$ 33                 | 41 $\pm$ 11                  | 25 $\pm$ 3                   |
| Unknown sugar 3              | 147,10                    | 26,72       | 1924 | n.i.             | n.i.              | n.i.               | n.d                          | n.d                          | n.d                          | 14 $\pm$ 3                   |
| Inositol 6TMS                | 317,97                    | 29,69       | 2082 | 2091             | 914               | 944                | 1380 $\pm$ 260               | 4 $\pm$ 1                    | n.d.                         | n.d.                         |
| Sucrose methoxyamine 8TMS    | 361,15                    | 38,66       | 2636 | 2640             | 760               | 767                | saturated                    | saturated                    | saturated                    | saturated                    |
